# Supplementary material for: Investigation of the Mechanisms of Chuankezhi Injection in the Treatment of Asthma Based on the Network Pharmacology Approach
Source: Hindawi journal article supplement (doi:10.1155/2021/5517041), 2021-06-10
Supplement: f1 [file 5517041.f1.pdf]

## Supplementary Information

Hao Zhu<sup>1</sup>, Yuhuan Shi<sup>1</sup>, Shanshan Jiang<sup>1</sup>, Xiuxiu Jiao<sup>1</sup>, Hui Zhu<sup>1</sup>, Rong Wang<sup>1</sup>, Yongfang Yuan<sup>\*1</sup>

<sup>1</sup> Department of Pharmacy, Shanghai Ninth People's Hospital, Shanghai Jiao Tong University School of Medicine, Shanghai, China.

\*Corresponding author: Yongfang Yuan, Department of Pharmacy, Shanghai Ninth People's Hospital, Shanghai Jiao Tong University School of Medicine, 639 Zhi Zao Ju Road, Shanghai 200011, China. Email: nmxyyf@126.com

Table S1 Chemical profiles and structure candidate compounds

| Abbreviation | Mol ID    | Name      | Molecular<br>formula                           | CAS No.  | MW<br>(g/mol) | OB<br>(%) | DL   | Chemical<br>structure                                                                 |
|--------------|-----------|-----------|------------------------------------------------|----------|---------------|-----------|------|---------------------------------------------------------------------------------------|
| YYH1         | MOL000006 | luteolin  | C <sub>15</sub> H <sub>10</sub> O <sub>6</sub> | 491-70-3 | 286.25        | 36.16     | 0.25 | 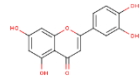  |
| YYH2         | MOL000098 | quercetin | C <sub>15</sub> H <sub>10</sub> O <sub>7</sub> | 117-39-5 | 302.25        | 46.43     | 0.28 |  |

|      |           |                       |                                                |            |        |       |      |                                                                                       |
|------|-----------|-----------------------|------------------------------------------------|------------|--------|-------|------|---------------------------------------------------------------------------------------|
| A    | MOL000359 | 3-epi-beta-sitosterol | C <sub>29</sub> H <sub>50</sub> O              | N/A        | 414.79 | 36.91 | 0.75 | 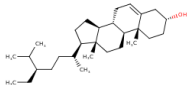   |
| YYH3 | MOL000422 | kaempferol            | C <sub>15</sub> H <sub>10</sub> O <sub>6</sub> | 520-18-3   | 286.25 | 41.88 | 0.24 |    |
| YYH4 | MOL000622 | magnograndiolide      | C <sub>15</sub> H <sub>22</sub> O <sub>4</sub> | 92618-98-9 | 266.37 | 63.71 | 0.19 |    |
| YYH5 | MOL001510 | 24-epicampesterol     | C <sub>28</sub> H <sub>48</sub> O              | 4651-51-8  | 400.76 | 37.58 | 0.71 |    |
| YYH6 | MOL001645 | linoleyl acetate      | C <sub>20</sub> H <sub>36</sub> O <sub>2</sub> | 5999-95-1  | 308.56 | 42.1  | 0.2  |   |
| YYH7 | MOL001771 | clionasterol          | C <sub>29</sub> H <sub>50</sub> O              | 83-47-6    | 414.79 | 36.91 | 0.75 |  |

|       |           |                          |                                                 |             |        |       |      |                                                                                       |
|-------|-----------|--------------------------|-------------------------------------------------|-------------|--------|-------|------|---------------------------------------------------------------------------------------|
| YYH8  | MOL001792 | liquiritigenin           | C <sub>15</sub> H <sub>12</sub> O <sub>4</sub>  | 578-86-9    | 256.27 | 32.76 | 0.18 | 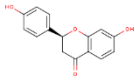   |
| YYH9  | MOL003044 | chryseriol               | C <sub>16</sub> H <sub>12</sub> O <sub>6</sub>  | 491-71-4    | 300.28 | 35.85 | 0.27 |    |
| YYH10 | MOL003542 | 8-isopentenyl-kaempferol | C <sub>20</sub> H <sub>18</sub> O <sub>6</sub>  | 28610-31-3  | 354.38 | 38.04 | 0.39 |    |
| YYH11 | MOL004372 | sagittatoside A          | C <sub>33</sub> H <sub>40</sub> O <sub>15</sub> | 118525-35-2 | 676.73 | 8.5   | 0.57 |    |
| YYH12 | MOL004373 | anhydroicaritin          | C <sub>21</sub> H <sub>20</sub> O <sub>6</sub>  | 118525-40-9 | 368.41 | 45.41 | 0.44 |  |
| YYH13 | MOL004374 | sagittatoside B          | C <sub>32</sub> H <sub>38</sub> O <sub>14</sub> | 118525-36-3 | 646.7  | 5.58  | 0.64 |  |

|       |           |                                                                                                            |                                                              |             |        |       |      |                                                                                       |
|-------|-----------|------------------------------------------------------------------------------------------------------------|--------------------------------------------------------------|-------------|--------|-------|------|---------------------------------------------------------------------------------------|
| YYH14 | MOL004380 | 2,7-dihydrohomoerysotrine                                                                                  | C <sub>20</sub> H <sub>27</sub> NO <sub>3</sub>              | 51095-85-3  | 329.48 | 39.14 | 0.49 | 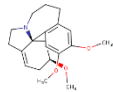   |
| YYH15 | MOL004382 | yinyanghuo A                                                                                               | C <sub>25</sub> H <sub>24</sub> O <sub>6</sub>               | 174391-72-1 | 420.49 | 56.96 | 0.77 |    |
| YYH16 | MOL004384 | yinyanghuo C                                                                                               | C <sub>20</sub> H <sub>16</sub> O <sub>5</sub>               | 149182-47-8 | 336.36 | 45.67 | 0.5  |    |
| YYH17 | MOL004386 | yinyanghuo E                                                                                               | C <sub>20</sub> H <sub>16</sub> O <sub>6</sub>               | 174286-26-1 | 352.36 | 51.63 | 0.55 |    |
| YYH18 | MOL004388 | 6-hydroxy-11,12-dimethoxy-2,2-dimethyl-1,8-dioxo-2,3,4,8-tetrahydro-1H-isochromeno[3,4-h]isoquinolin-2-ium | C <sub>20</sub> H <sub>20</sub> NO <sub>6</sub> <sup>+</sup> | N/A         | 370.41 | 60.64 | 0.66 |   |
| YYH19 | MOL004391 | 8-prenyl-flavone                                                                                           | C <sub>20</sub> H <sub>18</sub> O <sub>2</sub>               | N/A         | 290.38 | 48.54 | 0.25 |  |

|       |           |                                                   |                                                 |             |        |       |      |                                                                                       |
|-------|-----------|---------------------------------------------------|-------------------------------------------------|-------------|--------|-------|------|---------------------------------------------------------------------------------------|
| YYH20 | MOL004396 | 1,2-bis(4-hydroxy-3-methoxyphenyl)propan-1,3-diol | C <sub>17</sub> H <sub>20</sub> O <sub>6</sub>  | N/A         | 320.37 | 52.31 | 0.22 | 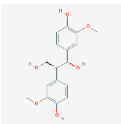   |
| YYH21 | MOL004425 | icariin                                           | C <sub>33</sub> H <sub>40</sub> O <sub>15</sub> | 489-32-7    | 676.73 | 41.58 | 0.61 |    |
| YYH22 | MOL004427 | icariside A7                                      | C <sub>23</sub> H <sub>26</sub> O <sub>10</sub> | N/A         | 462.49 | 31.91 | 0.86 |    |
| YYH23 | MOL004430 | icariside I                                       | C <sub>27</sub> H <sub>30</sub> O <sub>11</sub> | 56725-99-6  | 530.57 | 21.88 | 0.85 |    |
| YYH24 | MOL004431 | icariside II                                      | C <sub>27</sub> H <sub>30</sub> O <sub>10</sub> | 113558-15-9 | 514.57 | 3.7   | 0.84 |  |
| YYH25 | N/A       | chlorogenic acid                                  | C <sub>16</sub> H <sub>18</sub> O <sub>9</sub>  | 327-97-9    | 354.31 | N/A   | N/A  |  |

|      |           |                                |                                                |            |        |       |      |                                                                                       |
|------|-----------|--------------------------------|------------------------------------------------|------------|--------|-------|------|---------------------------------------------------------------------------------------|
| BJT1 | MOL000358 | beta-sitosterol                | C <sub>29</sub> H <sub>50</sub> O              | 83-46-5    | 414.79 | 36.91 | 0.75 | 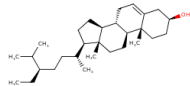   |
| A    | MOL000359 | 3-epi-beta-sitosterol          | C <sub>29</sub> H <sub>50</sub> O              | N/A        | 414.79 | 36.91 | 0.75 |    |
| BJT2 | MOL001649 | 2-hydroxy-3-methylantraquinone | C <sub>15</sub> H <sub>10</sub> O <sub>3</sub> | 17241-40-6 | 238.25 | 26.09 | 0.18 |    |
| BJT3 | MOL002879 | diop                           | C <sub>24</sub> H <sub>38</sub> O <sub>4</sub> | 27554-26-3 | 390.62 | 43.59 | 0.39 |    |
| BJT4 | MOL002883 | ethyl oleate                   | C <sub>20</sub> H <sub>38</sub> O <sub>2</sub> | 111-62-6   | 310.58 | 32.4  | 0.19 |  |

|       |           |                                                                   |                                                |             |        |        |      |                                                                                       |
|-------|-----------|-------------------------------------------------------------------|------------------------------------------------|-------------|--------|--------|------|---------------------------------------------------------------------------------------|
| BJT5  | MOL006147 | alizarin-2-methylether                                            | C <sub>15</sub> H <sub>10</sub> O <sub>4</sub> | 6003-11-8   | 254.25 | 32.81  | 0.21 | 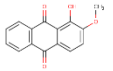   |
| BJT6  | MOL009495 | 1,5,15-tri-O-methylmorindol                                       | C <sub>18</sub> H <sub>16</sub> O <sub>6</sub> | 942609-65-6 | 328.34 | 95.85  | 0.37 |    |
| BJT7  | MOL009496 | 1,3,5-trihydroxy-2-methoxy-6-(methoxymethyl)anthracene-9,10-dione | C <sub>17</sub> H <sub>14</sub> O <sub>7</sub> | N/A         | 330.31 | 80.42  | 0.38 |    |
| BJT8  | MOL009498 | 1,6-Dihydroxy-2,4-dimethoxyanthraquinone                          | C <sub>16</sub> H <sub>12</sub> O <sub>6</sub> | 142878-33-9 | 300.28 | 18.42  | 0.3  |    |
| BJT9  | MOL009500 | 9,10-anthracenedione                                              | C <sub>17</sub> H <sub>14</sub> O <sub>6</sub> | 877238-55-6 | 314.31 | 104.54 | 0.34 |   |
| BJT10 | MOL009504 | 1-hydroxy-6-hydroxymethylanthracenequinone                        | C <sub>15</sub> H <sub>10</sub> O <sub>4</sub> | N/A         | 254.25 | 81.77  | 0.21 |  |
| BJT11 | MOL009514 | 1-methoxy-2-hydroxyanthraquinone                                  | C <sub>15</sub> H <sub>10</sub> O <sub>4</sub> | 6170-6-5    | 254.25 | 8.7    | 0.21 |  |

|       |           |                                                          |                                                 |            |        |       |      |                                                                                       |
|-------|-----------|----------------------------------------------------------|-------------------------------------------------|------------|--------|-------|------|---------------------------------------------------------------------------------------|
| BJT12 | MOL009519 | (2R,3S)-(+)-3',5-Dihydroxy-4 ,7-dimethoxydihydroflavonol | C <sub>17</sub> H <sub>16</sub> O <sub>7</sub>  | N/A        | 332.33 | 77.24 | 0.33 | 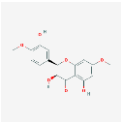   |
| BJT13 | MOL009524 | 3beta,20(R),5-alkenyl-stigmastol                         | C <sub>29</sub> H <sub>50</sub> O               | N/A        | 414.79 | 36.91 | 0.75 |    |
| BJT14 | MOL009537 | americanin A                                             | C <sub>18</sub> H <sub>16</sub> O <sub>6</sub>  | 69506-79-2 | 328.34 | 46.71 | 0.35 |    |
| BJT15 | MOL009547 | deacetyl asperulosidic acid                              | C <sub>16</sub> H <sub>22</sub> O <sub>11</sub> | 14259-55-3 | 390.38 | 16.9  | 0.45 |    |
| BJT16 | MOL009551 | isoprincepin                                             | C <sub>27</sub> H <sub>26</sub> O <sub>9</sub>  | N/A        | 494.53 | 49.12 | 0.77 |   |
| BJT17 | MOL009553 | monotropein                                              | C <sub>16</sub> H <sub>22</sub> O <sub>11</sub> | 5945-50-6  | 390.38 | 2.53  | 0.44 |  |



BJT18      MOL009562      ohioensin-A      C<sub>23</sub>H<sub>16</sub>O<sub>5</sub>      121353-47-7      372.39      38.13      0.76

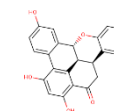

Table S2 Degree values of candidate compounds in herb-candidate compound-target network

| Candidate Compounds |                                 |              |        |
|---------------------|---------------------------------|--------------|--------|
| Molecule ID         | Molecule Name                   | Abbreviation | Degree |
| MOL000098           | quercetin                       | YYH2         | 205    |
| MOL000006           | luteolin                        | YYH1         | 83     |
| MOL000422           | kaempferol                      | YYH3         | 75     |
| MOL004373           | anhydroicaritin                 | YYH12        | 39     |
| MOL004380           | 2,7-dihydrohomoerysotrine       | YYH14        | 39     |
| MOL000358           | beta-sitosterol                 | BJT1         | 38     |
| MOL001649           | 2-hydroxy-3-methylanthraquinone | BJT2         | 34     |
| MOL004391           | 8-prenyl-flavone                | YYH19        | 31     |
| MOL003542           | 8-isopentenyl-kaempferol        | YYH10        | 30     |
| MOL003044           | chryseriol                      | YYH9         | 21     |
| MOL004372           | sagittatoside A                 | YYH11        | 18     |

|           |                                                                       |       |    |
|-----------|-----------------------------------------------------------------------|-------|----|
| MOL009514 | 1-methoxy-2-hydroxyanthraquinone                                      | BJT11 | 18 |
| MOL004430 | icaraside I                                                           | YYH23 | 17 |
| MOL009495 | 1,5,15-tri-O-methylmorindol                                           | BJT6  | 15 |
| MOL006147 | alizarin-2-methylether                                                | BJT5  | 14 |
| MOL001792 | liquiritigenin                                                        | YYH8  | 13 |
| MOL009500 | 9,10-anthracenedione                                                  | BJT9  | 13 |
| MOL009504 | 1-hydroxy-6-hydroxymethyl<br>anthracenequinone                        | BJT10 | 13 |
| MOL004384 | yinyanghuo C                                                          | YYH16 | 12 |
| MOL004386 | yinyanghuo E                                                          | YYH17 | 12 |
| MOL004396 | 1,2-bis(4-hydroxy-3-<br>methoxyphenyl)propan-1,3-diol                 | YYH20 | 12 |
| MOL009537 | americanin A                                                          | BJT14 | 12 |
| MOL009496 | 1,3,5-trihydroxy-2-methoxy-6-<br>(methoxymethyl)anthracene-9,10-dione | BJT7  | 11 |
| MOL004382 | yinyanghuo A                                                          | YYH15 | 10 |
| MOL009519 | (2R,3S)-(+)-3',5-dihydroxy-4 ,7-                                      | BJT12 | 10 |

|           |                                                                                      |       |   |
|-----------|--------------------------------------------------------------------------------------|-------|---|
|           | dimethoxydihydroflavonol                                                             |       |   |
| MOL004374 | sagittatoside B                                                                      | YYH13 | 8 |
| MOL000359 | 3-epi-beta-sitosterol                                                                | A     | 8 |
|           | 6-hydroxy-11,12-dimethoxy-2,2-                                                       |       |   |
| MOL004388 | dimethyl-1,8-dioxo-2,3,4,8-tetrahydro-<br>1H-isochromeno[3,4-h]isoquinolin-2-<br>ium | YYH18 | 7 |
|           | 1,6-Dihydroxy-2,4-                                                                   |       |   |
| MOL009498 | dimethoxyanthraquinone                                                               | BJT8  | 7 |
| MOL000622 | magnograndiolide                                                                     | YYH4  | 5 |
| MOL001645 | linoleyl acetate                                                                     | YYH6  | 5 |
| MOL004427 | icaraside A7                                                                         | YYH22 | 4 |
| MOL002879 | diop                                                                                 | BJT3  | 4 |
| MOL009562 | ohioensin-A                                                                          | BJT18 | 4 |
| MOL001510 | 24-epicampesterol                                                                    | YYH5  | 3 |
| MOL001771 | clionasterol                                                                         | YYH7  | 3 |
| MOL004425 | icariin                                                                              | YYH21 | 3 |

|           |                                  |       |   |
|-----------|----------------------------------|-------|---|
| MOL004431 | icariside II                     | YYH24 | 3 |
| N/A       | chlorogenic acid                 | YYH25 | 3 |
| MOL009551 | isoprincepin                     | BJT16 | 3 |
| MOL009553 | monotropein                      | BJT17 | 3 |
| MOL002883 | ethyl oleate                     | BJT4  | 2 |
| MOL009524 | 3beta,20(R),5-alkenyl-stigmastol | BJT13 | 2 |
| MOL009547 | deacetyl asperulosidic acid      | BJT15 | 2 |

Table S3 Degree values of potential targets in herb-candidate compound-target network

| Potential Targets |                                             |        |
|-------------------|---------------------------------------------|--------|
| Gene symbol       | Target name                                 | Degree |
| PTGS2             | Prostaglandin G/H synthase 2                | 30     |
| NCOA2             | Nuclear receptor coactivator 2              | 28     |
| HSP90AA1          | Heat shock protein HSP 90-alpha             | 23     |
| PTGS1             | Prostaglandin G/H synthase 1                | 22     |
| TOP2A             | DNA topoisomerase 2-alpha                   | 18     |
| SCN5A             | Sodium channel protein type 5 subunit alpha | 15     |

|        |                                                                                   |    |
|--------|-----------------------------------------------------------------------------------|----|
| PIK3CG | Phosphatidylinositol 4,5-bisphosphate 3-kinase<br>catalytic subunit gamma isoform | 14 |
| CALM1  | Calmodulin-1                                                                      | 14 |
| PRSS1  | Trypsin-1                                                                         | 14 |
| F10    | Coagulation factor X                                                              | 13 |
| AR     | Androgen receptor                                                                 | 13 |
| PRKACA | cAMP-dependent protein kinase catalytic subunit alpha                             | 12 |
| DPP4   | Dipeptidyl peptidase 4                                                            | 12 |
| GABRA1 | Gamma-aminobutyric acid receptor subunit alpha-1                                  | 11 |
| RXRA   | Retinoic acid receptor RXR-alpha                                                  | 11 |
| ADRB2  | Beta-2 adrenergic receptor                                                        | 10 |
| ESR1   | Estrogen receptor                                                                 | 10 |
| F7     | Coagulation factor VII                                                            | 10 |
| KCNH2  | Potassium voltage-gated channel subfamily H member<br>2                           | 8  |
| PDE3A  | cGMP-inhibited 3',5'-cyclic phosphodiesterase A                                   | 8  |
| CDK2   | Cyclin-dependent kinase 2                                                         | 8  |

|        |                                                  |   |
|--------|--------------------------------------------------|---|
| PIM1   | Serine/threonine-protein kinase pim-1            | 8 |
| PPARG  | Peroxisome proliferator-activated receptor gamma | 8 |
| PGR    | Progesterone receptor                            | 7 |
| SLC6A4 | Sodium-dependent serotonin transporter           | 7 |
| GSK3B  | Glycogen synthase kinase-3 beta                  | 7 |
| ACHE   | Acetylcholinesterase                             | 7 |
| F2R    | Proteinase-activated receptor 1                  | 7 |
| NOS2   | Nitric oxide synthase, inducible                 | 7 |
| CHRM3  | Muscarinic acetylcholine receptor M3             | 6 |
| CHRM1  | Muscarinic acetylcholine receptor M1             | 6 |
| ADRA1B | Alpha-1B adrenergic receptor                     | 6 |
| CHRNA7 | Neuronal acetylcholine receptor subunit alpha-7  | 6 |
| CASP3  | Caspase-3                                        | 6 |
| IGHG1  | Immunoglobulin heavy constant gamma 1            | 6 |
| NCOA1  | Nuclear receptor coactivator 1                   | 6 |
| PKIA   | cAMP-dependent protein kinase inhibitor alpha    | 5 |
| CCNA2  | Cyclin-A2                                        | 5 |

|        |                                                     |   |
|--------|-----------------------------------------------------|---|
| CA2    | Carbonic anhydrase 2                                | 5 |
| KDR    | Vascular endothelial growth factor receptor 2       | 5 |
| GABRA2 | Gamma-aminobutyric acid receptor subunit alpha-2    | 4 |
| CHRM2  | Muscarinic acetylcholine receptor M2                | 4 |
| JUN    | Transcription factor AP-1                           | 4 |
| SLC6A3 | Sodium-dependent dopamine transporter               | 4 |
| MAOB   | Amine oxidase                                       | 4 |
| KCNMA1 | Calcium-activated potassium channel subunit alpha-1 | 4 |
| AKR1B1 | Aldo-keto reductase family 1 member B1              | 4 |
| CYP1B1 | Cytochrome P450 1B1                                 | 4 |
| NOS3   | Nitric oxide synthase, endothelial                  | 4 |
| MAPK14 | Mitogen-activated protein kinase 14                 | 4 |
| CHEK1  | Serine/threonine-protein kinase Chk1                | 4 |
| DRD1   | D(1A) dopamine receptor                             | 3 |
| CHRM4  | Muscarinic acetylcholine receptor M4                | 3 |
| HTR2A  | 5-hydroxytryptamine receptor 2A                     | 3 |
| ADRA1A | Alpha-1A adrenergic receptor                        | 3 |

|        |                                                                      |   |
|--------|----------------------------------------------------------------------|---|
| CHRNA2 | Neuronal acetylcholine receptor subunit alpha-2                      | 3 |
| OPRM1  | Mu-type opioid receptor                                              | 3 |
| BCL2   | Apoptosis regulator Bcl-2                                            | 3 |
| BAX    | Apoptosis regulator BAX                                              | 3 |
| CASP9  | Caspase-9                                                            | 3 |
| CHRM5  | Muscarinic acetylcholine receptor M5                                 | 3 |
| RELA   | Transcription factor p65                                             | 3 |
| AKT1   | RAC-alpha serine/threonine-protein kinase                            | 3 |
| TNF    | Tumor necrosis factor                                                | 3 |
| XDH    | Xanthine dehydrogenase/oxidase                                       | 3 |
| MMP1   | Interstitial collagenase                                             | 3 |
| HMOX1  | Heme oxygenase 1                                                     | 3 |
| ICAM1  | Intercellular adhesion molecule 1                                    | 3 |
| GSTP1  | Glutathione S-transferase P                                          | 3 |
| SLC2A4 | Solute carrier family 2, facilitated glucose transporter<br>member 4 | 3 |
| INSR   | Insulin receptor                                                     | 3 |



|        |                                                                       |   |
|--------|-----------------------------------------------------------------------|---|
| NOX4   | NADPH oxidase 4                                                       | 3 |
| MAOA   | Amine oxidase                                                         | 3 |
| FLT3   | Receptor-type tyrosine-protein kinase FLT3                            | 3 |
| ALOX5  | Arachidonate 5-lipoxygenase                                           | 3 |
| CA7    | Carbonic anhydrase 7                                                  | 3 |
| CA12   | Carbonic anhydrase 12                                                 | 3 |
| ABCG2  | Broad substrate specificity ATP-binding cassette<br>transporter ABCG2 | 3 |
| ABCC1  | Multidrug resistance-associated protein 1                             | 3 |
| SLC6A2 | Sodium-dependent noradrenaline transporter                            | 3 |
| ESR2   | Estrogen receptor beta                                                | 3 |
| PDE5A  | cGMP-specific 3',5'-cyclic phosphodiesterase                          | 3 |
| GABRA3 | Gamma-aminobutyric acid receptor subunit alpha-3                      | 2 |
| CASP8  | Caspase-8                                                             | 2 |
| PRKCA  | Protein kinase C alpha type                                           | 2 |
| TGFB1  | Transforming growth factor beta-1 proprotein                          | 2 |
| PON1   | Serum paraoxonase/arylesterase 1                                      | 2 |

|        |                                      |   |
|--------|--------------------------------------|---|
| NR3C2  | Mineralocorticoid receptor           | 2 |
| OPRD1  | Delta-type opioid receptor           | 2 |
| HRH1   | Histamine H1 receptor                | 2 |
| HTR2C  | 5-hydroxytryptamine receptor 2C      | 2 |
| ADRA2B | Alpha-2B adrenergic receptor         | 2 |
| DRD2   | D(2) dopamine receptor               | 2 |
| LTA4H  | Leukotriene A-4 hydrolase            | 2 |
| EGFR   | Epidermal growth factor receptor     | 2 |
| VEGFA  | Vascular endothelial growth factor A | 2 |
| CCND1  | G1/S-specific cyclin-D1              | 2 |
| BCL2L1 | Bcl-2-like protein 1                 | 2 |
| CDKN1A | Cyclin-dependent kinase inhibitor 1  | 2 |
| MMP2   | 72 kDa type IV collagenase           | 2 |
| MMP9   | Matrix metalloproteinase-9           | 2 |
| MAPK1  | Mitogen-activated protein kinase 1   | 2 |
| IL10   | Interleukin-10                       | 2 |
| RB1    | Retinoblastoma-associated protein    | 2 |

|         |                                             |   |
|---------|---------------------------------------------|---|
| IL6     | Interleukin-6                               | 2 |
| TP53    | Cellular tumor antigen p53                  | 2 |
| NFKBIA  | NF-kappa-B inhibitor alpha                  | 2 |
| TOP1    | DNA topoisomerase 1                         | 2 |
| ERBB2   | Receptor tyrosine-protein kinase erbB-2     | 2 |
| BIRC5   | Baculoviral IAP repeat-containing protein 5 | 2 |
| IL2     | Interleukin-2                               | 2 |
| CCNB1   | G2/mitotic-specific cyclin-B1               | 2 |
| TYR     | Tyrosinase                                  | 2 |
| IFNG    | Interferon gamma                            | 2 |
| CD40LG  | CD40 ligand                                 | 2 |
| MET     | Hepatocyte growth factor receptor           | 2 |
| ADORA1  | Adenosine receptor A1                       | 2 |
| GLO1    | Lactoylglutathione lyase                    | 2 |
| PARP1   | Poly [ADP-ribose] polymerase 1              | 2 |
| CA4     | Carbonic anhydrase 4                        | 2 |
| AKR1B10 | Aldo-keto reductase family 1 member B10     | 2 |

|        |                                                                   |   |
|--------|-------------------------------------------------------------------|---|
| AHSA1  | Activator of 90 kDa heat shock protein ATPase<br>homolog 1        | 2 |
| STAT1  | Signal transducer and activator of transcription 1-<br>alpha/beta | 2 |
| CDK1   | Cyclin-dependent kinase 1                                         | 2 |
| CYP3A4 | Cytochrome P450 3A4                                               | 2 |
| CYP1A2 | Cytochrome P450 1A2                                               | 2 |
| CYP1A1 | Cytochrome P450 1A1                                               | 2 |
| SELE   | E-selectin                                                        | 2 |
| VCAM1  | Vascular cell adhesion protein 1                                  | 2 |
| NR1I2  | Nuclear receptor subfamily 1 group I member 2                     | 2 |
| HAS2   | Hyaluronan synthase 2                                             | 2 |
| AHR    | Aryl hydrocarbon receptor                                         | 2 |
| PSMD3  | 26S proteasome non-ATPase regulatory subunit 3                    | 2 |
| NR1I3  | Nuclear receptor subfamily 1 group I member 3                     | 2 |
| DIO1   | Type I iodothyronine deiodinase                                   | 2 |
| GSTM1  | Glutathione S-transferase Mu 1                                    | 2 |

|         |                                                                |   |
|---------|----------------------------------------------------------------|---|
| GSTM2   | Glutathione S-transferase Mu 2                                 | 2 |
| CYP19A1 | Aromatase                                                      | 2 |
| HSD17B2 | Estradiol 17-beta-dehydrogenase 2                              | 2 |
| ABCB1   | ATP-dependent translocase ABCB1                                | 2 |
| AKR1C3  | Aldo-keto reductase family 1 member C3                         | 2 |
| ADRB1   | Beta-1 adrenergic receptor                                     | 2 |
| ADRA1D  | Alpha-1D adrenergic receptor                                   | 2 |
| GABRA5  | Gamma-aminobutyric acid receptor subunit alpha-5               | 1 |
| MAP2    | Microtubule-associated protein 2                               | 1 |
| CDK4    | Cyclin-dependent kinase 4                                      | 1 |
| MDM2    | E3 ubiquitin-protein ligase Mdm2                               | 1 |
| APP     | Amyloid-beta precursor protein                                 | 1 |
| PCNA    | Proliferating cell nuclear antigen                             | 1 |
| CASP7   | Caspase-7                                                      | 1 |
| MCL1    | Induced myeloid leukemia cell differentiation protein<br>Mcl-1 | 1 |
| IL4     | Interleukin-4                                                  | 1 |

|        |                                                   |   |
|--------|---------------------------------------------------|---|
| XIAP   | E3 ubiquitin-protein ligase XIAP                  | 1 |
| PTGES  | Prostaglandin E synthase                          | 1 |
| NUF2   | Kinetochore protein Nuf2                          | 1 |
| ADCY2  | Adenylate cyclase type 2                          | 1 |
| CDK5R1 | Cyclin-dependent kinase 5 activator 1             | 1 |
| CCNB3  | G2/mitotic-specific cyclin-B3                     | 1 |
| SYK    | Tyrosine-protein kinase SYK                       | 1 |
| TTR    | Transthyretin                                     | 1 |
| MMP12  | Macrophage metalloelastase                        | 1 |
| CD38   | ADP-ribosyl cyclase/cyclic ADP-ribose hydrolase 1 | 1 |
| TNKS2  | Poly [ADP-ribose] polymerase tankyrase-2          | 1 |
| TNKS   | Poly [ADP-ribose] polymerase tankyrase-1          | 1 |
| ARG1   | Arginase-1                                        | 1 |
| MMP3   | Stromelysin-1                                     | 1 |
| FOS    | Proto-oncogene c-Fos                              | 1 |
| EIF6   | Eukaryotic translation initiation factor 6        | 1 |
| PLAU   | Urokinase-type plasminogen activator              | 1 |

|         |                                                    |   |
|---------|----------------------------------------------------|---|
| EGF     | Pro-epidermal growth factor                        | 1 |
| ELK1    | ETS domain-containing protein Elk-1                | 1 |
| POR     | NADPH--cytochrome P450 reductase                   | 1 |
| ODC1    | Ornithine decarboxylase                            | 1 |
| RAF1    | RAF proto-oncogene serine/threonine-protein kinase | 1 |
| SOD1    | Superoxide dismutase                               | 1 |
| HIF1A   | Hypoxia-inducible factor 1-alpha                   | 1 |
| RUNX1T1 | Protein CBFA2T1                                    | 1 |
| HERC5   | E3 ISG15--protein ligase HERC5                     | 1 |
| HSPA5   | Endoplasmic reticulum chaperone BiP                | 1 |
| ACACA   | Acetyl-CoA carboxylase 1                           | 1 |
| CAV1    | Caveolin-1                                         | 1 |
| MYC     | Myc proto-oncogene protein                         | 1 |
| F3      | Tissue factor                                      | 1 |
| GJA1    | Gap junction alpha-1 protein                       | 1 |
| IL1B    | Interleukin-1 beta                                 | 1 |
| CCL2    | C-C motif chemokine 2                              | 1 |

|          |                                                                                                         |   |
|----------|---------------------------------------------------------------------------------------------------------|---|
| PTGER3   | Prostaglandin E2 receptor EP3 subtype                                                                   | 1 |
| CXCL8    | Interleukin-8                                                                                           | 1 |
| PRKCB    | Protein kinase C beta type                                                                              | 1 |
| DUOX2    | Dual oxidase 2                                                                                          | 1 |
| HSPB1    | Heat shock protein beta-1                                                                               | 1 |
| SULT1E1  | Sulfotransferase 1E1                                                                                    | 1 |
| MGAM     | Maltase-glucoamylase, intestinal                                                                        | 1 |
| PLAT     | Tissue-type plasminogen activator                                                                       | 1 |
| THBD     | Thrombomodulin                                                                                          | 1 |
| SERPINE1 | Plasminogen activator inhibitor 1                                                                       | 1 |
| COL1A1   | Collagen alpha-1                                                                                        | 1 |
| PTEN     | Phosphatidylinositol 3,4,5-trisphosphate 3-phosphatase<br>and dual-specificity protein phosphatase PTEN | 1 |
| IL1A     | Interleukin-1 alpha                                                                                     | 1 |
| MPO      | Myeloperoxidase                                                                                         | 1 |
| NCF1     | Neutrophil cytosol factor 1                                                                             | 1 |
| NFE2L2   | Nuclear factor erythroid 2-related factor 2                                                             | 1 |



|        |                                                             |   |
|--------|-------------------------------------------------------------|---|
| NQO1   | NAD(P)H dehydrogenase [quinone] 1                           | 1 |
| COL3A1 | Collagen alpha-1                                            | 1 |
| CXCL11 | C-X-C motif chemokine 11                                    | 1 |
| CXCL2  | C-X-C motif chemokine 2                                     | 1 |
| DCAF5  | DDB1- and CUL4-associated factor 5                          | 1 |
| CHEK2  | Serine/threonine-protein kinase Chk2                        | 1 |
| CLDN4  | Claudin-4                                                   | 1 |
| PPARA  | Peroxisome proliferator-activated receptor alpha            | 1 |
| PPARD  | Peroxisome proliferator-activated receptor delta            | 1 |
| HSF1   | Heat shock factor protein 1                                 | 1 |
| CRP    | C-reactive protein                                          | 1 |
| CXCL10 | C-X-C motif chemokine 10                                    | 1 |
| CHUK   | Inhibitor of nuclear factor kappa-B kinase subunit<br>alpha | 1 |
| SPP1   | Osteopontin                                                 | 1 |
| RUNX2  | Runt-related transcription factor 2                         | 1 |
| RASSF1 | Ras association domain-containing protein 1                 | 1 |

|        |                                              |   |
|--------|----------------------------------------------|---|
| E2F1   | Transcription factor E2F1                    | 1 |
| E2F2   | Transcription factor E2F2                    | 1 |
| ACP3   | Prostatic acid phosphatase                   | 1 |
| CTSD   | Cathepsin D                                  | 1 |
| IGFBP3 | Insulin-like growth factor-binding protein 3 | 1 |
| IGF2   | Insulin-like growth factor II                | 1 |
| IRF1   | Interferon regulatory factor 1               | 1 |
| ERBB3  | Receptor tyrosine-protein kinase erbB-3      | 1 |
| PCOLCE | Procollagen C-endopeptidase enhancer 1       | 1 |
| NPEPPS | Puromycin-sensitive aminopeptidase           | 1 |
| HK2    | Hexokinase-2                                 | 1 |
| NKX3-1 | Homeobox protein Nkx-3.1                     | 1 |
| RASA1  | Ras GTPase-activating protein 1              | 1 |
| AVPR2  | Vasopressin V2 receptor                      | 1 |
| IGF1R  | Insulin-like growth factor 1 receptor        | 1 |
| F2     | Prothrombin                                  | 1 |
| AURKB  | Aurora kinase B                              | 1 |

|         |                                                        |   |
|---------|--------------------------------------------------------|---|
| DRD4    | D(4) dopamine receptor                                 | 1 |
| PIK3R1  | Phosphatidylinositol 3-kinase regulatory subunit alpha | 1 |
| ADORA2A | Adenosine receptor A2a                                 | 1 |
| DAPK1   | Death-associated protein kinase 1                      | 1 |
| PYGL    | Glycogen phosphorylase, liver form                     | 1 |
| CA1     | Carbonic anhydrase 1                                   | 1 |
| SRC     | Proto-oncogene tyrosine-protein kinase Src             | 1 |
| PTK2    | Focal adhesion kinase 1                                | 1 |
| MMP13   | Collagenase 3                                          | 1 |
| CA3     | Carbonic anhydrase 3                                   | 1 |
| ALOX15  | Arachidonate 15-lipoxygenase                           | 1 |
| PLK1    | Serine/threonine-protein kinase PLK1                   | 1 |
| CA6     | Carbonic anhydrase 6                                   | 1 |
| PKN1    | Serine/threonine-protein kinase N1                     | 1 |
| CA14    | Carbonic anhydrase 14                                  | 1 |
| CA9     | Carbonic anhydrase 9                                   | 1 |
| CSNK2A1 | Casein kinase II subunit alpha                         | 1 |

|         |                                                                     |   |
|---------|---------------------------------------------------------------------|---|
| ALOX12  | Arachidonate 12-lipoxygenase, 12S-type                              | 1 |
| NEK2    | Serine/threonine-protein kinase Nek2                                | 1 |
| CXCR1   | C-X-C chemokine receptor type 1                                     | 1 |
| CAMK2B  | Calcium/calmodulin-dependent protein kinase type II<br>subunit beta | 1 |
| ALK     | ALK tyrosine kinase receptor                                        | 1 |
| NEK6    | Serine/threonine-protein kinase Nek6                                | 1 |
| PLA2G1B | Phospholipase A2                                                    | 1 |
| CA5A    | Carbonic anhydrase 5A, mitochondrial                                | 1 |
| BACE1   | Beta-secretase 1                                                    | 1 |
| AXL     | Tyrosine-protein kinase receptor UFO                                | 1 |
| NUAK1   | NUAK family SNF1-like kinase 1                                      | 1 |
| AKR1C2  | Aldo-keto reductase family 1 member C2                              | 1 |
| AKR1C1  | Aldo-keto reductase family 1 member C1                              | 1 |
| AKR1C4  | Aldo-keto reductase family 1 member C4                              | 1 |
| CA13    | Carbonic anhydrase 13                                               | 1 |
| AKR1A1  | Aldo-keto reductase family 1 member A1                              | 1 |

|         |                                                                            |   |
|---------|----------------------------------------------------------------------------|---|
| GPR35   | G-protein coupled receptor 35                                              | 1 |
| IKBKB   | Inhibitor of nuclear factor kappa-B kinase subunit beta                    | 1 |
| MAPK8   | Mitogen-activated protein kinase 8                                         | 1 |
| PPP3CA  | Serine/threonine-protein phosphatase 2B catalytic<br>subunit alpha isoform | 1 |
| SLPI    | Antileukoproteinase                                                        | 1 |
| HSD17B1 | Estradiol 17-beta-dehydrogenase 1                                          | 1 |
| ESRRA   | Steroid hormone receptor ERR1                                              | 1 |
| GRIA2   | Glutamate receptor 2                                                       | 1 |
| GABRA6  | Gamma-aminobutyric acid receptor subunit alpha-6                           | 1 |
| PYGM    | Glycogen phosphorylase, muscle form                                        | 1 |
| RXRB    | Retinoic acid receptor RXR-beta                                            | 1 |
| ADH1C   | Alcohol dehydrogenase 1C                                                   | 1 |
| PRSS3   | Trypsin-3                                                                  | 1 |
| DRD5    | D(1B) dopamine receptor                                                    | 1 |
| ADRA2A  | Alpha-2A adrenergic receptor                                               | 1 |
| HTR1A   | 5-hydroxytryptamine receptor 1A                                            | 1 |

|        |                                                  |   |
|--------|--------------------------------------------------|---|
| HTR3A  | 5-hydroxytryptamine receptor 3A                  | 1 |
| HTR1B  | 5-hydroxytryptamine receptor 1B                  | 1 |
| GABRG3 | Gamma-aminobutyric acid receptor subunit gamma-3 | 1 |
| GABRE  | Gamma-aminobutyric acid receptor subunit epsilon | 1 |

Table S4 Degree values of gene symbols in protein-protein interaction network

| Gene Symbol | Target Name                          | Degree |
|-------------|--------------------------------------|--------|
| IL6         | Interleukin-6                        | 40     |
| TNF         | Tumor necrosis factor                | 38     |
| IL1B        | Interleukin-1 beta                   | 35     |
| CXCL8       | Interleukin-8                        | 32     |
| CCL2        | C-C motif chemokine 2                | 29     |
| IL10        | Interleukin-10                       | 29     |
| VEGFA       | Vascular endothelial growth factor A | 28     |
| JUN         | Transcription factor AP-1            | 28     |
| PTGS2       | Prostaglandin G/H synthase 2         | 27     |
| ICAM1       | Intercellular adhesion molecule 1    | 27     |

|        |                                                                   |    |
|--------|-------------------------------------------------------------------|----|
| MMP9   | Matrix metalloproteinase-9                                        | 27 |
| IL4    | Interleukin-4                                                     | 24 |
| MAPK1  | Mitogen-activated protein kinase 1                                | 24 |
| CRP    | C-reactive protein                                                | 20 |
| EGF    | Pro-epidermal growth factor                                       | 20 |
| IL2    | Interleukin-2                                                     | 19 |
| MMP2   | 72 kDa type IV collagenase                                        | 19 |
| IFNG   | Interferon gamma                                                  | 19 |
| STAT1  | Signal transducer and activator of transcription 1-<br>alpha/beta | 19 |
| CXCL10 | C-X-C motif chemokine 10                                          | 18 |
| MMP1   | Interstitial collagenase                                          | 17 |
| HMOX1  | Heme oxygenase 1                                                  | 17 |
| NOS3   | Nitric oxide synthase, endothelial                                | 17 |
| VCAM1  | Vascular cell adhesion protein 1                                  | 17 |
| SELE   | E-selectin                                                        | 16 |
| TGFB1  | Transforming growth factor beta-1 proprotein                      | 16 |

|          |                                                  |    |
|----------|--------------------------------------------------|----|
| SERPINE1 | Plasminogen activator inhibitor 1                | 16 |
| MAPK14   | Mitogen-activated protein kinase 14              | 15 |
| IL1A     | Interleukin-1 alpha                              | 15 |
| PPARG    | Peroxisome proliferator-activated receptor gamma | 14 |
| F2       | Prothrombin                                      | 13 |
| MPO      | Myeloperoxidase                                  | 12 |
| CD40LG   | CD40 ligand                                      | 12 |
| MMP3     | Stromelysin-1                                    | 11 |
| NOS2     | Nitric oxide synthase, inducible                 | 11 |
| F3       | Tissue factor                                    | 11 |
| IRF1     | Interferon regulatory factor 1                   | 10 |
| F2R      | Proteinase-activated receptor 1                  | 10 |
| ARG1     | Arginase-1                                       | 9  |
| CHRM2    | Muscarinic acetylcholine receptor M2             | 8  |
| CXCR1    | C-X-C chemokine receptor type 1                  | 7  |
| THBD     | Thrombomodulin                                   | 7  |
| ADRB2    | Beta-2 adrenergic receptor                       | 6  |



|        |                                              |   |
|--------|----------------------------------------------|---|
| IGFBP3 | Insulin-like growth factor-binding protein 3 | 6 |
| ADRA1B | Alpha-1B adrenergic receptor                 | 5 |
| OPRM1  | Mu-type opioid receptor                      | 5 |
| ADORA1 | Adenosine receptor A1                        | 5 |
| COL1A1 | Collagen alpha-1                             | 5 |
| ALOX15 | Arachidonate 15-lipoxygenase                 | 5 |
| PTGS1  | Prostaglandin G/H synthase 1                 | 5 |
| ALOX5  | Arachidonate 5-lipoxygenase                  | 5 |
| CASP8  | Caspase-8                                    | 5 |
| PLAU   | Urokinase-type plasminogen activator         | 5 |
| CYP3A4 | Cytochrome P450 3A4                          | 4 |
| CHRM3  | Muscarinic acetylcholine receptor M3         | 4 |
| HRH1   | Histamine H1 receptor                        | 4 |
| SYK    | Tyrosine-protein kinase SYK                  | 4 |
| GSTP1  | Glutathione S-transferase P                  | 3 |
| SOD1   | Superoxide dismutase                         | 2 |
| GSTM1  | Glutathione S-transferase Mu 1               | 2 |

|        |                                                                                   |   |
|--------|-----------------------------------------------------------------------------------|---|
| PIK3CG | Phosphatidylinositol 4,5-bisphosphate 3-kinase<br>catalytic subunit gamma isoform | 2 |
| LTA4H  | Leukotriene A-4 hydrolase                                                         | 2 |
| MMP12  | Macrophage metalloelastase                                                        | 1 |
| ABCB1  | ATP-dependent translocase ABCB1                                                   | 1 |
| ADRB1  | Beta-1 adrenergic receptor                                                        | 1 |

---

Table S5 Degree values of compounds in disease related candidate compound-target-pathway network

| Compound | Name                                        | Degree |
|----------|---------------------------------------------|--------|
| YYH2     | quercetin                                   | 49     |
| YYH1     | luteolin                                    | 23     |
| YYH3     | kaempferol                                  | 21     |
| YYH19    | 8-prenyl-flavone                            | 13     |
| BJT1     | beta-sitosterol                             | 13     |
| YYH14    | 2,7-dihydrohomoerysotrine                   | 11     |
| YYH12    | anhydroicaritin                             | 11     |
| BJT2     | 2-hydroxy-3-methylanthraquinone             | 10     |
| YYH9     | chryseriol                                  | 7      |
| YYH10    | 8-isopentenyl-kaempferol                    | 6      |
| YYH8     | liquiritigenin                              | 6      |
| BJT11    | 1-methoxy-2-hydroxyanthraquinone            | 5      |
| BJT10    | 1-hydroxy-6-hydroxymethyl anthracenequinone | 5      |
| BJT5     | alizarin-2-methylether                      | 5      |
| YYH23    | icaraside I                                 | 4      |

|       |                                                                                                            |   |
|-------|------------------------------------------------------------------------------------------------------------|---|
| YYH20 | 1,2-bis(4-hydroxy-3-methoxyphenyl)propan-1,3-diol                                                          | 4 |
| YYH11 | sagittatoside A                                                                                            | 4 |
| BJT12 | (2R,3S)-(+)-3',5-dihydroxy-4,7-dimethoxydihydroflavonol                                                    | 4 |
| BJT9  | 9,10-anthracenedione                                                                                       | 4 |
| BJT8  | 1,6-dihydroxy-2,4-dimethoxyanthraquinone                                                                   | 4 |
| BJT6  | 1,5,15-tri-O-methylmorindol                                                                                | 4 |
| YYH18 | 6-hydroxy-11,12-dimethoxy-2,2-dimethyl-1,8-dioxo-2,3,4,8-tetrahydro-1H-isochromeno[3,4-h]isoquinolin-2-ium | 3 |
| YYH17 | yinyanghuo E                                                                                               | 3 |
| YYH16 | yinyanghuo C                                                                                               | 3 |
| YYH6  | linoleyl acetate                                                                                           | 3 |
| BJT18 | ohioensin-A                                                                                                | 3 |
| BJT7  | 1,3,5-trihydroxy-2-methoxy-6-(methoxymethyl)anthracene-9,10-dione                                          | 3 |

|       |              |   |
|-------|--------------|---|
| BJT3  | diop         | 3 |
| YYH22 | icaraside A7 | 2 |
| YYH15 | yinyanghuo A | 2 |
| BJT14 | americanin A | 2 |

Table S6 Degree values of gene symbols in disease related candidate compound-target-pathway network

| Gene Symbol | Target Name                                                                       | Degree |
|-------------|-----------------------------------------------------------------------------------|--------|
| PTGS2       | Prostaglandin G/H synthase 2                                                      | 34     |
| PTGS1       | Prostaglandin G/H synthase 1                                                      | 23     |
| PIK3CG      | Phosphatidylinositol 4,5-bisphosphate 3-kinase<br>catalytic subunit gamma isoform | 15     |
| MAPK1       | Mitogen-activated protein kinase 1                                                | 13     |
| F2R         | Proteinase-activated receptor 1                                                   | 11     |
| TNF         | Tumor necrosis factor                                                             | 11     |
| ADRB2       | Beta-2 adrenergic receptor                                                        | 11     |
| MAPK14      | Mitogen-activated protein kinase 14                                               | 10     |
| NOS2        | Nitric oxide synthase, inducible                                                  | 10     |

|        |                                                                  |    |
|--------|------------------------------------------------------------------|----|
| PPARG  | Peroxisome proliferator-activated receptor<br>gamma              | 10 |
| IL6    | Interleukin-6                                                    | 10 |
| JUN    | Transcription factor AP-1                                        | 10 |
| NOS3   | Nitric oxide synthase, endothelial                               | 9  |
| CXCL8  | Interleukin-8                                                    | 9  |
| SLC6A4 | Sodium-dependent serotonin transporter                           | 8  |
| STAT1  | Signal transducer and activator of transcription<br>1-alpha/beta | 7  |
| ICAM1  | Intercellular adhesion molecule 1                                | 7  |
| MMP9   | Matrix metalloproteinase-9                                       | 7  |
| CHRM3  | Muscarinic acetylcholine receptor M3                             | 7  |
| ADRA1B | Alpha-1B adrenergic receptor                                     | 7  |
| CASP8  | Caspase-8                                                        | 7  |
| VCAM1  | Vascular cell adhesion protein 1                                 | 6  |
| MMP2   | 72 kDa type IV collagenase                                       | 6  |
| VEGFA  | Vascular endothelial growth factor A                             | 6  |

|          |                                              |   |
|----------|----------------------------------------------|---|
| CHRM2    | Muscarinic acetylcholine receptor M2         | 6 |
| TGFB1    | Transforming growth factor beta-1 proprotein | 6 |
| EGF      | Pro-epidermal growth factor                  | 5 |
| SERPINE1 | Plasminogen activator inhibitor 1            | 5 |
| IL1B     | Interleukin-1 beta                           | 5 |
| ALOX5    | Arachidonate 5-lipoxygenase                  | 5 |
| GSTP1    | Glutathione S-transferase P                  | 5 |
| IL4      | Interleukin-4                                | 5 |
| IFNG     | Interferon gamma                             | 5 |
| IL2      | Interleukin-2                                | 5 |
| MMP1     | Interstitial collagenase                     | 5 |
| PLAU     | Urokinase-type plasminogen activator         | 4 |
| CXCL10   | C-X-C motif chemokine 10                     | 4 |
| CCL2     | C-C motif chemokine 2                        | 4 |
| SYK      | Tyrosine-protein kinase SYK                  | 4 |
| HMOX1    | Heme oxygenase 1                             | 4 |
| OPRM1    | Mu-type opioid receptor                      | 4 |

|        |                                              |   |
|--------|----------------------------------------------|---|
| ADRB1  | Beta-1 adrenergic receptor                   | 3 |
| GSTM1  | Glutathione S-transferase Mu 1               | 3 |
| IGFBP3 | Insulin-like growth factor-binding protein 3 | 3 |
| MMP3   | Stromelysin-1                                | 3 |
| THBD   | Thrombomodulin                               | 3 |
| SELE   | E-selectin                                   | 3 |
| IL1A   | Interleukin-1 alpha                          | 3 |
| F3     | Tissue factor                                | 3 |
| COL1A1 | Collagen alpha-1                             | 3 |
| CD40LG | CD40 ligand                                  | 3 |
| IL10   | Interleukin-10                               | 3 |
| HRH1   | Histamine H1 receptor                        | 3 |
| CXCR1  | C-X-C chemokine receptor type 1              | 2 |
| ALOX15 | Arachidonate 15-lipoxygenase                 | 2 |
| F2     | Prothrombin                                  | 2 |
| IRF1   | Interferon regulatory factor 1               | 2 |
| MPO    | Myeloperoxidase                              | 2 |



Table S7 Degree values of pathways in disease related candidate compound-target-pathway network

| Pathway                                              | Degree |
|------------------------------------------------------|--------|
| AGE-RAGE signaling pathway in diabetic complications | 21     |
| Pathways in cancer                                   | 17     |
| IL-17 signaling pathway                              | 16     |
| PI3K-Akt signaling pathway                           | 12     |
| Inflammatory bowel disease (IBD)                     | 11     |
| Calcium signaling pathway                            | 10     |
| HIF-1 signaling pathway                              | 9      |
| NF-kappa B signaling pathway                         | 9      |
| Transcriptional misregulation in cancer              | 8      |
| HTLV-I infection                                     | 7      |
| Hepatitis C                                          | 7      |
| Chemokine signaling pathway                          | 6      |

---

|                                       |   |
|---------------------------------------|---|
| Serotonergic synapse                  | 6 |
| Estrogen signaling pathway            | 6 |
| Complement and coagulation cascades   | 6 |
| Fc epsilon RI signaling pathway       | 6 |
| Leukocyte transendothelial migration  | 5 |
| RIG-I-like receptor signaling pathway | 5 |
| Platinum drug resistance              | 4 |
| p53 signaling pathway                 | 3 |

---
